# Supplementary material for: Alterations of the chemical profile of cholesterol in cancer tissue as traced with ToF-SIMS
Source: Royal Society of Chemistry journal article supplement (doi:10.1039/d4an01050g), 2024-01-01
Supplement: d4an01050g1.zip [file d4an01050g1.zip]

## Supplementary information

### Alterations of the chemical profile of cholesterol in cancer tissue as traced with ToF-SIMS

Auraya Manaprasertsak<sup>a</sup>, Julhash U. Kazi<sup>b</sup>, Catharina Hagerling<sup>a</sup>, Kenneth J. Pienta<sup>c</sup>, Per Malmberg<sup>d</sup>, and Emma U. Hammarlund<sup>a</sup>

<sup>a</sup>Tissue Development and Evolution (TiDE), Department of Experimental Medical Sciences, Lund University, Lund, Sweden

<sup>b</sup>Division of Translational Cancer Research, Department of Laboratory Medicine, Lund University, Lund, Sweden

<sup>c</sup>The Cancer Ecology Center, Brady Urological Institute, Johns Hopkins School of Medicine, Baltimore, MD, USA.

<sup>d</sup>Department of Chemistry and Chemical Engineering, Chalmers University of Technology, 412 96 Gothenburg, Sweden.

#### Contents:

**Figure S1.** The percentage ratios of various cholesterol peaks of mammary glands in whole tissue (green; n=3) and selected areas 500×500 μm<sup>2</sup> (purple; n=10). The majority of variations in isotopic patterns showed no significant distinctions between the whole tissue and the selected regions.

**Figure S2.** The normalized ratio of fragmented cholesterol (C<sub>27</sub>H<sub>45</sub><sup>+</sup>: *m/z* 369) over intact cholesterol (C<sub>27</sub>H<sub>45</sub>O<sup>+</sup>: *m/z* 385) from mammary glands in WT mice (blue; n=19) and MMTV-PyMT mice (orange; n=19). Asterisks indicate a statistically significant difference with *p* < 0.0001 (\*\*\*\*).

**Figure S3.** The fractional abundance from DESI-MS of **A)** fragmented cholesterol ( $C_{27}H_{45}^+$ :  $m/z$  369) and **B)** intact cholesterol ( $C_{27}H_{45}O^+$ :  $m/z$  385) from mammary glands in WT mice (blue) and MMTV-PyMT mice (orange). Asterisks indicate a statistically significant difference with  $p < 0.05$  (\*) and  $p < 0.001$  (\*\*\*).

**Figure S4.** The percentage ratio of fragmented cholesterol ( $C_{27}H_{45}^+$ :  $m/z$  369) over intact cholesterol ( $C_{27}H_{45}O^+$ :  $m/z$  385) from pure cholesterol (pink;  $n=5$ ), mammary glands in WT mice (blue;  $n=19$ ) and MMTV-PyMT mice (orange;  $n=19$ ). Asterisks indicate a statistically significant difference with  $p < 0.0001$  (\*\*\*\*).

**Figure S5.** The distribution of salts ( $Na^+$ :  $m/z$  23 and  $K^+$ :  $m/z$  39) and phosphatidylcholine head group ( $C_5H_{12}N^+$ :  $m/z$  86 and  $C_5H_{15}PNO_4^+$ :  $m/z$  184) from mammary glands from **A)** WT mice and **B)** MMTV-PyMT mice.

**Figure S6.** The peak areas of salts ( $Na^+$ :  $m/z$  23 and  $K^+$ :  $m/z$  39) and phosphatidylcholine head group ( $C_5H_{12}N^+$ :  $m/z$  86 and  $C_5H_{15}PNO_4^+$ :  $m/z$  184) from mammary glands from WT mice and MMTV-PyMT mice.

**Figure S7.** The percentage ratios of various cholesterol peaks of 3 cholesterol standards. The percentage ratios of each peak were labelled with the Roman numerals in **Fig. 5**.

**Fig. S8.** The overlay spectra in the range of  $m/z$  366 to 370 to show the oxidation effects of **A)** non-enriched cholesterol standard ( $C_{27}H_{46}O$ ), **B)** enriched  $^{13}C$  cholesterol standard ( $^{13}CC_{26}H_{46}O$ ) and **C)** enriched  $^{13}C_2$  cholesterol standard ( $^{13}C_2C_{25}H_{46}O$ ).

**Figure S9.** The normalized ratio of isotopic patterns for  $^{13}CC_{26}H_{43}^+/C_{27}H_{43}^+$  (368/367),  $^{13}CC_{26}H_{45}^+/C_{27}H_{45}^+$  (370/369),  $^{13}C_2C_{25}H_{45}^+/^{13}CC_{26}H_{45}^+$  (371/370),  $^{13}C_2C_{25}H_{45}^+/C_{27}H_{45}^+$  (371/369),  $^{13}CC_{26}H_{43}O^+/C_{27}H_{43}O^+$  (384/383),  $^{13}CC_{26}H_{45}O^+/C_{27}H_{45}O^+$  (386/385),  $^{13}C_2C_{25}H_{45}O^+/^{13}CC_{26}H_{45}O^+$  (387/386), and  $^{13}C_2C_{25}H_{45}O^+/C_{27}H_{45}O^+$  (387/385) from mammary glands in WT mice (blue;

49 n=19) and MMTV-PyMT mice (orange; n=19). Asterisks indicate a statistically significant  
50 difference with  $p < 0.01$  (\*\*),  $p < 0.001$  (\*\*\*) and  $p < 0.0001$  (\*\*\*\*).

51 **Figure S10.** The zoom-in overlay spectra of mammary glands from **A)** and **C)** WT mouse (FVB)  
52 **B)** and **D)** tumour-bearing mouse (MMTV-PyMT).

53

**Figure S1.** The percentage ratios of various cholesterol peaks of mammary glands in whole tissue (green; n=3) and selected areas 500×500  $\mu\text{m}^2$  (purple; n=10). The majority of variations in isotopic patterns showed no significant distinctions between the whole tissue and the selected regions.

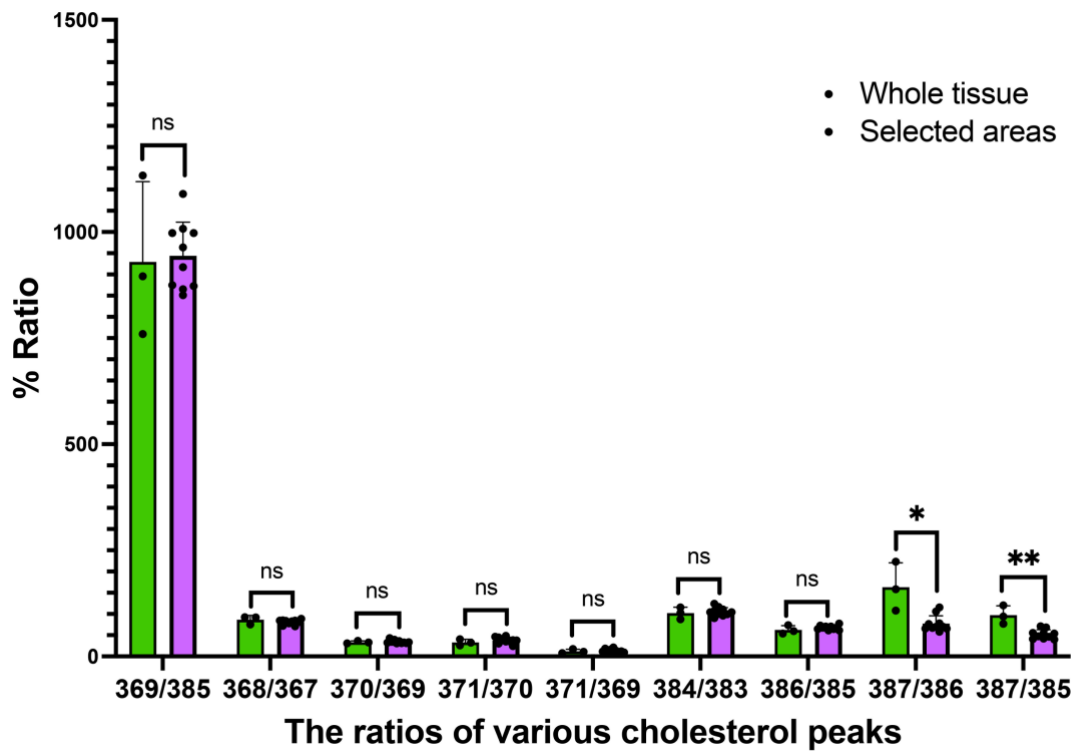

**Figure S2.** The normalized ratio of fragmented cholesterol ( $C_{27}H_{45}^+$ :  $m/z$  369) over intact cholesterol ( $C_{27}H_{45}O^+$ :  $m/z$  385) from mammary glands in WT mice (blue;  $n=19$ ) and MMTV-PyMT mice (orange;  $n=19$ ). Asterisks indicate a statistically significant difference with  $p < 0.0001$  (\*\*\*\*).

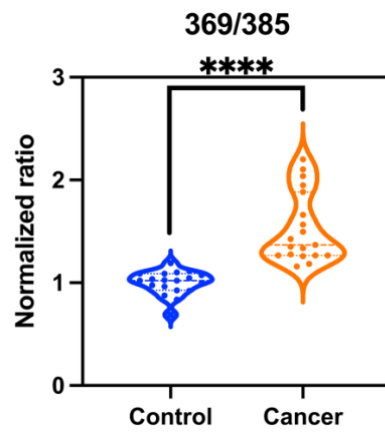

**Figure S3.** The fractional abundance from DESI-MS of **A)** fragmented cholesterol ( $C_{27}H_{45}^+$ :  $m/z$  369) and **B)** intact cholesterol ( $C_{27}H_{45}O^+$ :  $m/z$  385) from mammary glands in WT mice (blue) and MMTV-PyMT mice (orange). Asterisks indicate a statistically significant difference with  $p < 0.05$  (\*) and  $p < 0.001$  (\*\*\*).

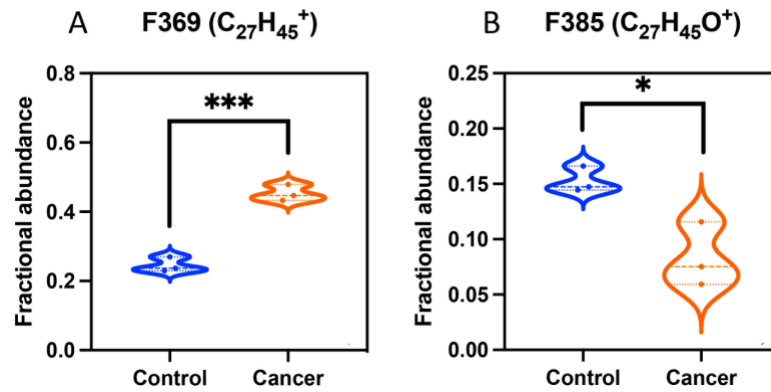

**Figure S4.** The percentage ratio of fragmented cholesterol ( $C_{27}H_{45}^+$ :  $m/z$  369) over intact cholesterol ( $C_{27}H_{45}O^+$ :  $m/z$  385) from pure cholesterol (pink;  $n=5$ ), mammary glands in WT mice (blue;  $n=19$ ) and MMTV-PyMT mice (orange;  $n=19$ ). Asterisks indicate a statistically significant difference with  $p < 0.0001$  (\*\*\*\*).

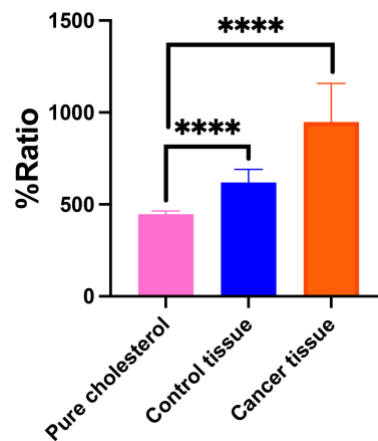

**Figure S5.** The distribution of salts ( $\text{Na}^+$ :  $m/z$  23 and  $\text{K}^+$ :  $m/z$  39) and phosphatidylcholine head group ( $\text{C}_5\text{H}_{12}\text{N}^+$ :  $m/z$  86 and  $\text{C}_5\text{H}_{15}\text{PNO}_4^+$ :  $m/z$  184) from mammary glands from **A)** WT mice and **B)** MMTV-PyMT mice.

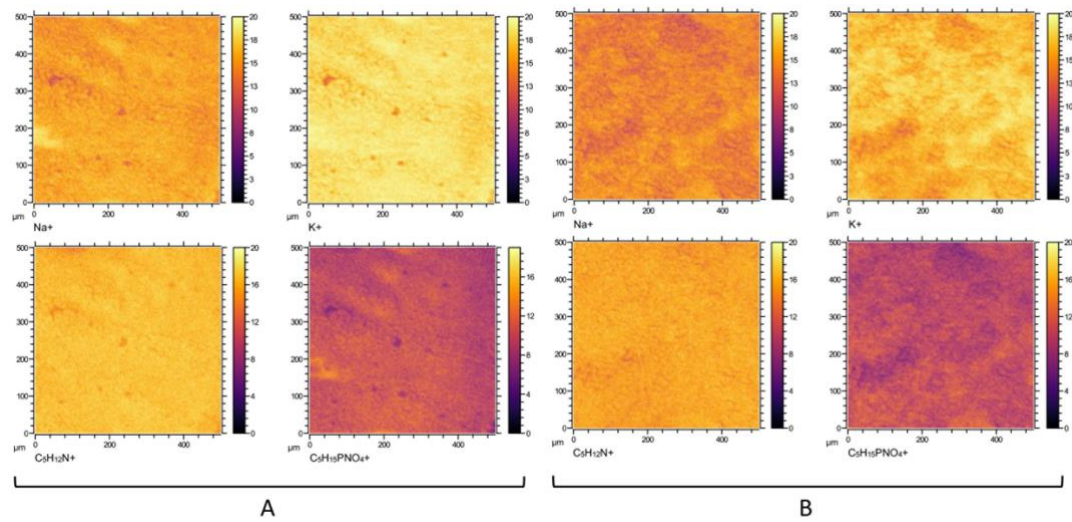



**Figure S6.** The peak areas of salts ( $\text{Na}^+$ :  $m/z$  23 and  $\text{K}^+$ :  $m/z$  39) and phosphatidylcholine head group ( $\text{C}_5\text{H}_{12}\text{N}^+$ :  $m/z$  86 and  $\text{C}_5\text{H}_{15}\text{PNO}_4^+$ :  $m/z$  184) from mammary glands from WT mice and MMTV-PyMT mice.

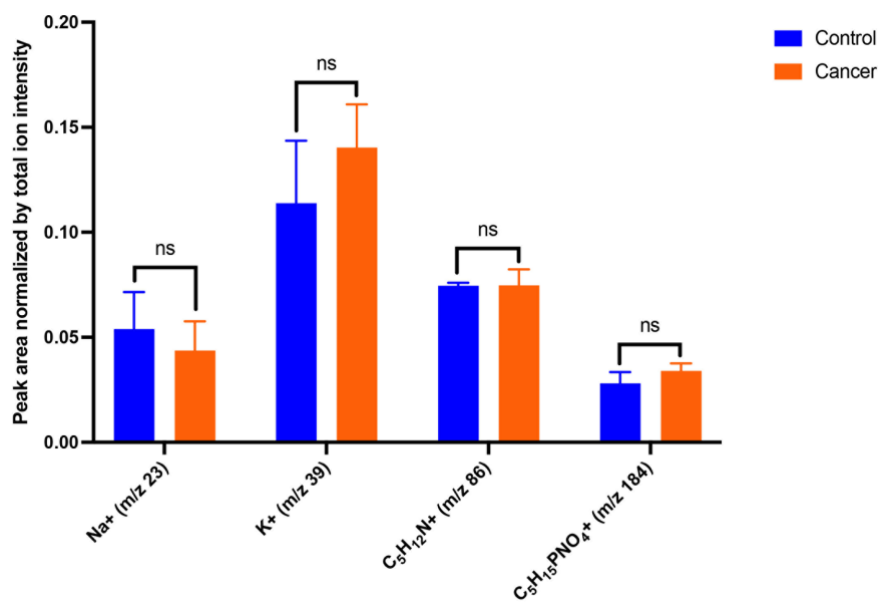

**Figure S7.** The percentage ratios of various cholesterol peaks of 3 cholesterol standards. The percentage ratios of each peak were labelled with the Roman numerals in **Fig. 5**.

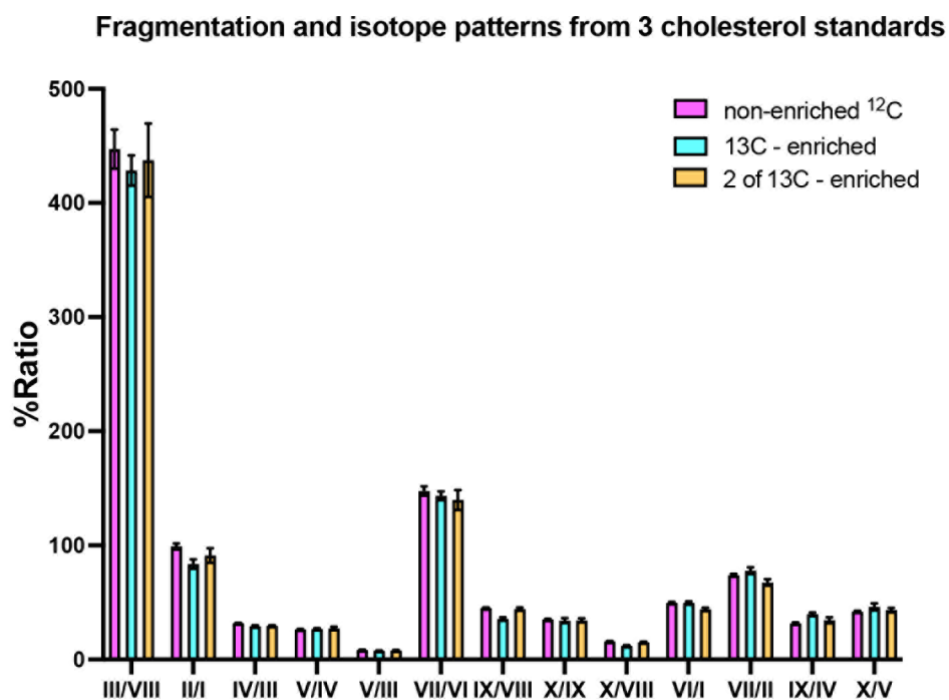

**Fig. S8.** The overlay spectra in the range of  $m/z$  366 to 370 to show the oxidation effects of **A)** non-enriched cholesterol standard ( $C_{27}H_{46}O$ ), **B)** enriched  $^{13}C$  cholesterol standard ( $^{13}CC_{26}H_{46}O$ ) and **C)** enriched  $^{13}C_2$  cholesterol standard ( $^{13}C_2C_{25}H_{46}O$ ).

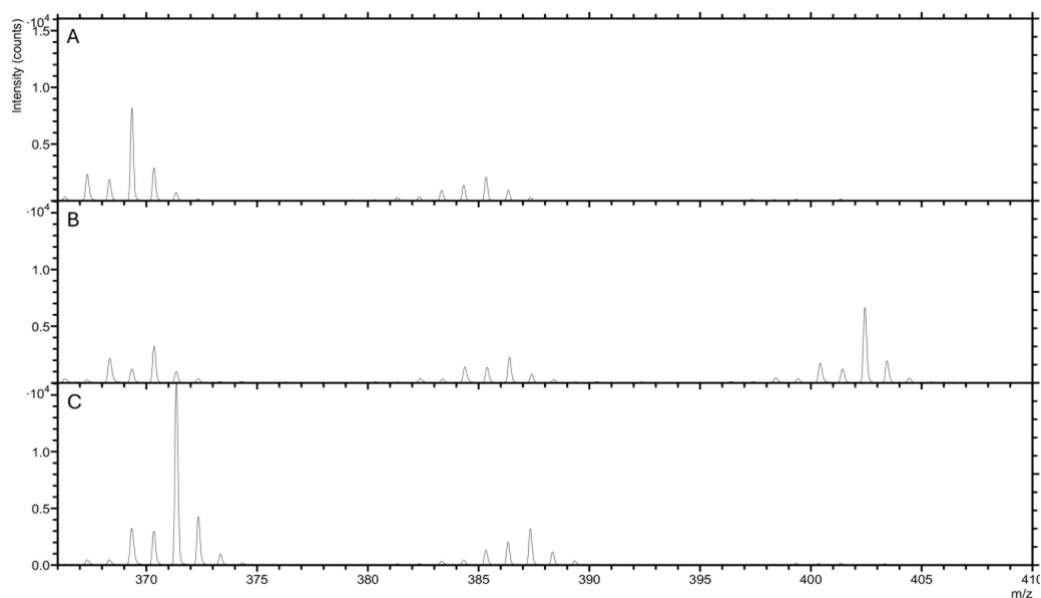

**Figure S9.** The normalized ratio of isotopic patterns for  $^{13}\text{C}_2\text{C}_{26}\text{H}_{43}^+/\text{C}_{27}\text{H}_{43}^+$  (368/367),  $^{13}\text{C}_2\text{C}_{26}\text{H}_{45}^+/\text{C}_{27}\text{H}_{45}^+$  (370/369),  $^{13}\text{C}_2\text{C}_{25}\text{H}_{45}^+/\text{C}_{26}\text{H}_{45}^+$  (371/370),  $^{13}\text{C}_2\text{C}_{25}\text{H}_{45}^+/\text{C}_{27}\text{H}_{45}^+$  (371/369),  $^{13}\text{C}_2\text{C}_{26}\text{H}_{43}\text{O}^+/\text{C}_{27}\text{H}_{43}\text{O}^+$  (384/383),  $^{13}\text{C}_2\text{C}_{26}\text{H}_{45}\text{O}^+/\text{C}_{27}\text{H}_{45}\text{O}^+$  (386/385),  $^{13}\text{C}_2\text{C}_{25}\text{H}_{45}\text{O}^+/\text{C}_{26}\text{H}_{45}\text{O}^+$  (387/386), and  $^{13}\text{C}_2\text{C}_{25}\text{H}_{45}\text{O}^+/\text{C}_{27}\text{H}_{45}\text{O}^+$  (387/385) from mammary glands in WT mice (blue; n=19) and MMTV-PyMT mice (orange; n=19). Asterisks indicate a statistically significant difference with  $p < 0.01$  (\*\*),  $p < 0.001$  (\*\*\*) and  $p < 0.0001$  (\*\*\*\*).

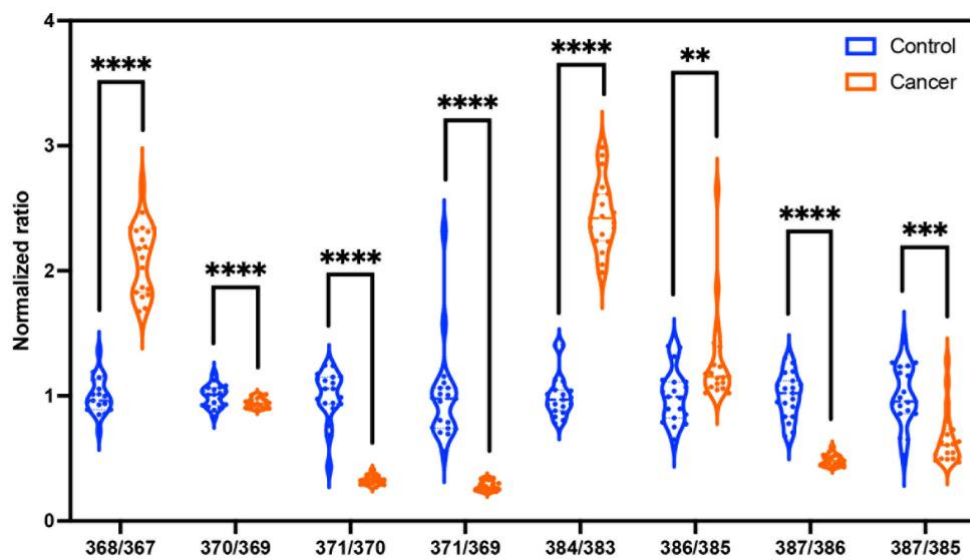

113 **Figure S10.** The zoom-in overlay spectra of mammary glands from **A)** and **C)** WT mouse (FVB)  
114 **B)** and **D)** tumour-bearing mouse (MMTV-PyMT).

115

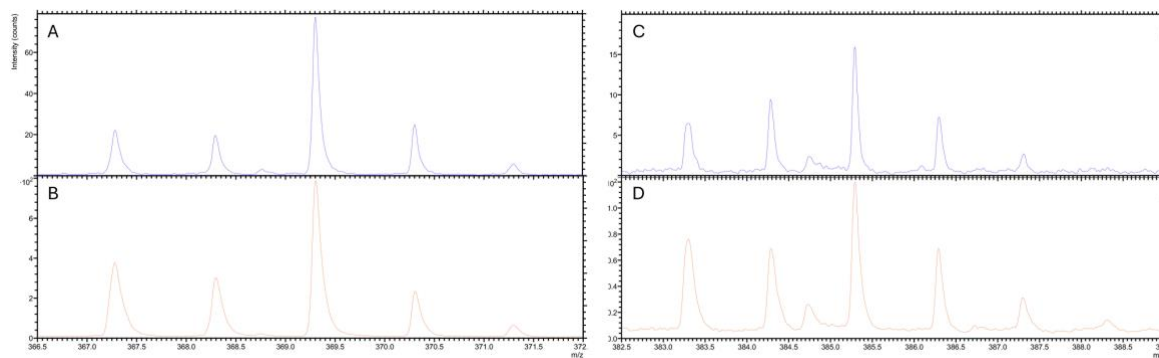

116
